# Supplementary material for: Genomic Analyses across Six Cancer Types Identify Basal-like Breast Cancer as a Unique Molecular Entity
Source: PubMed Central journal article supplement — Sci Rep. 2013 Dec 18;3:3544. doi: 10.1038/srep03544 (PMC6506566; doi:10.1038/srep03544), 2013-12-18
Supplement: srep03544-s3.pdf [file srep03544-s3.pdf]

# Genomic Analyses across Six Cancer Types Identify Basal-like Breast Cancer as a Unique Molecular Entity

Aleix Prat, Barbara Adamo, Cheng Fan, Vicente Peg, Maria Vidal, Patricia Galván, Ana Vivancos, Paolo Nuciforo, Héctor G. Palmer, Shaheenah Dawood, Jordi Rodón, Santiago Ramon y Cajal, Josep Maria Del Campo, Enriqueta Felip, Josep Tabernero and Javier Cortés

## Supplemental Information

**Fig. S1** Principal component loading plots for PC1, PC2 and PC3 in an independent microarray dataset (GSE23768) of breast cancers, colorectal adenocarcinomas, lung adenocarcinoma and lung squamous cell lung cancer. Samples are colored based on cancer type.

**Fig. S2** Consensus clustering analysis. **(A)** Cumulative distribution function (CDF) for  $k=2$  to  $k=10$ . **(B)** Delta area plot.

**Fig. S3** Ability of a previously published TP53 mutation vs. wild-type signature to predict TP53 mutations in the TCGA combined dataset. **(A)** TP53 signature scores across TP53WT vs. TP53 mutated cancers. **(B)** Area under the ROC curve of the signature for predicting TP53 mutations. **(C)** Distribution of TP53 mutation percentages across cancer types (with gene expression data) and area under the ROC curve in each category.

**Fig. S4** Correlation of a previously published PTEN-loss gene signature with PTEN, INPP4B , phosphor-S6 and phosphor-4E-BP1 protein expression in the TCGA breast cancer dataset.

**Fig. S5** PAM50 intrinsic subtyping of an independent microarray dataset (GSE23768) of breast cancers, colorectal adenocarcinomas, lung adenocarcinoma and lung squamous cell lung cancer. Below the array tree, subtype calls are provided, including Claudin-low vs. not calls.

**Fig. S6** PAM50 intrinsic subtyping of an in-house breast cancer and colorectal adenocarcinoma dataset. Below the array tree, subtype calls are provided. Note: only 49 genes of the 50 PAM50 genes were evaluated.

**Fig. S7** HER2 FISH of a CRC sample from Fig. S6.

**Fig. S8** Evaluation of batch effects across 4 TCGA cancer types during year 2000. **(A)** Distribution of microarray chip barcodes across 4 cancer types. No significant differences were observed. LUAD, lung adenocarcinoma; SCC, squamous cell lung cancer. **(B)** Principal component loading plots for PC1, PC2 and PC3. Samples are colored based on cancer type. **(C)** Principal component loading plots for PC1, PC2 and PC3. Samples are colored based on the rank ordered microarray chip barcodes divided into deciles.

**Fig. S9** Evaluation of batch effects within each TCGA cancer type. Principal component loading plots for PC1 and PC2. Samples are colored based on the rank ordered microarray chip barcodes divided into two groups (i.e. above and below the median of all barcode numbers).

# Figure S1

- BREAST
- BREAST\_Basal-like
- CCR
- LUAD
- LUSC

**PC 1 0.16**

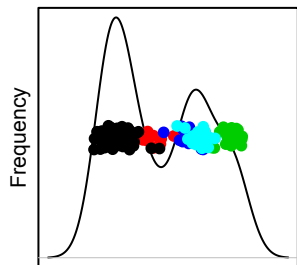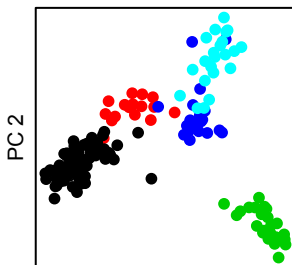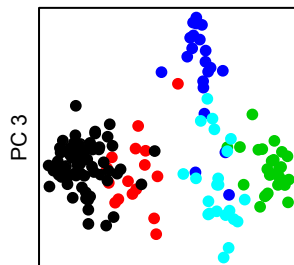

**PC 2 0.08**

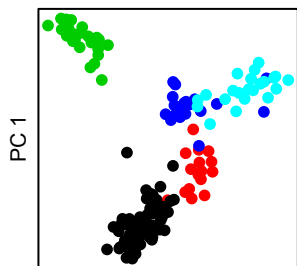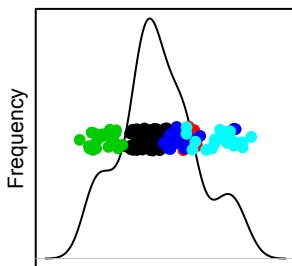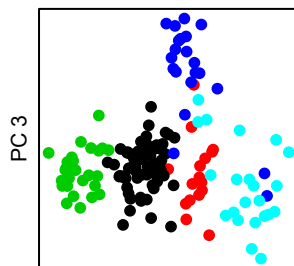

**PC 3 0.05**

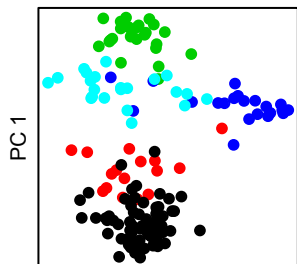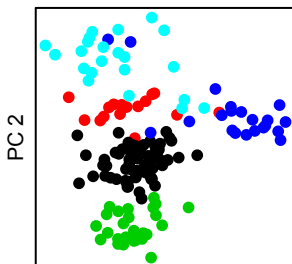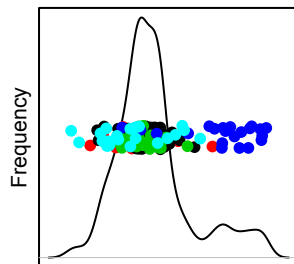

# Figure S2

## A

### consensus CDF

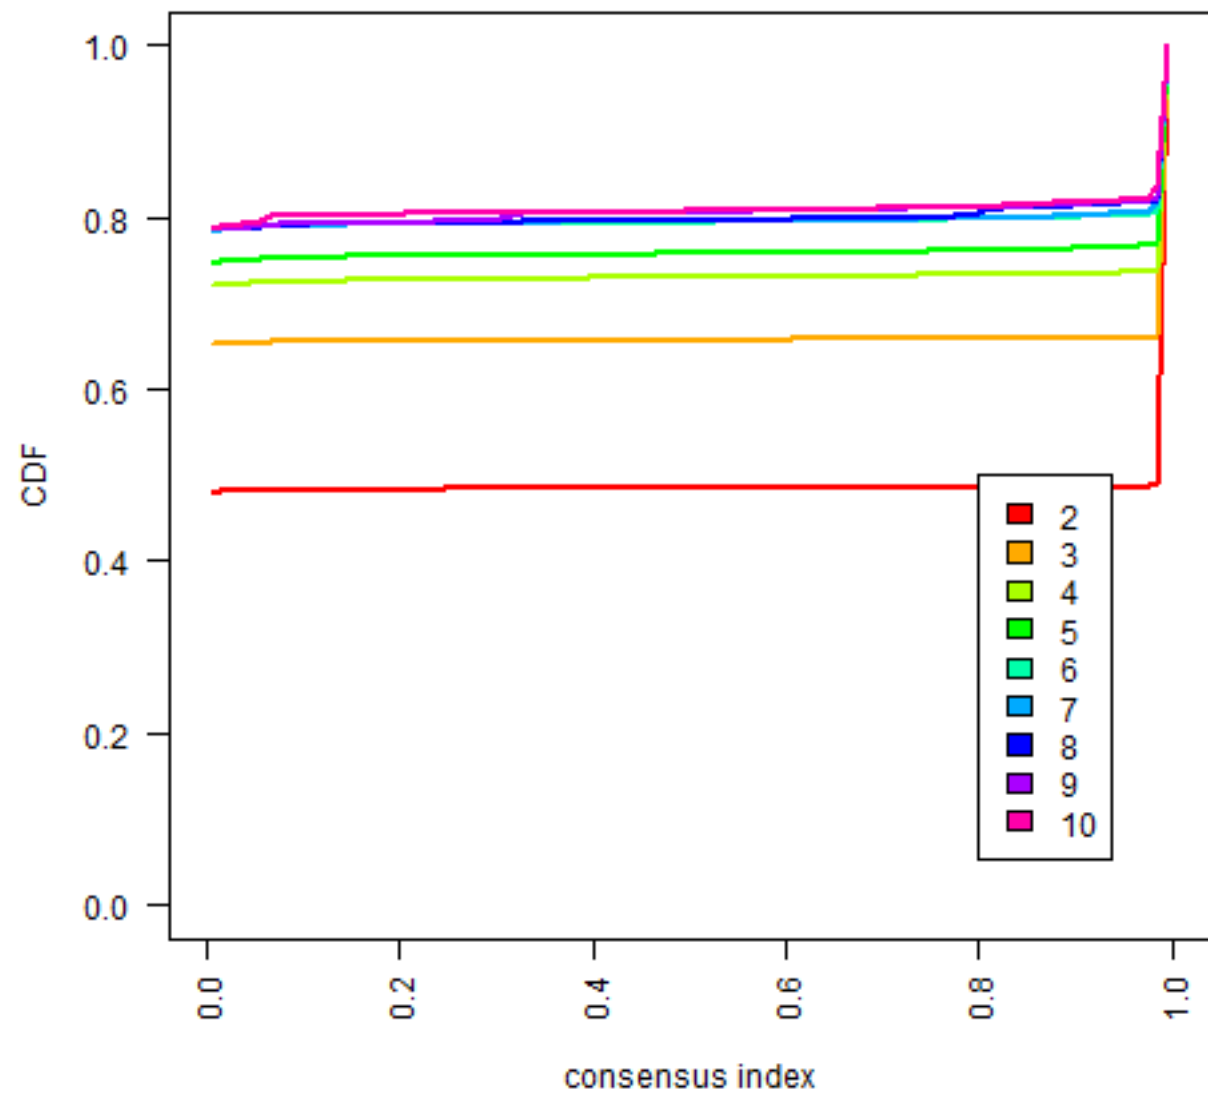

## B

### Delta area

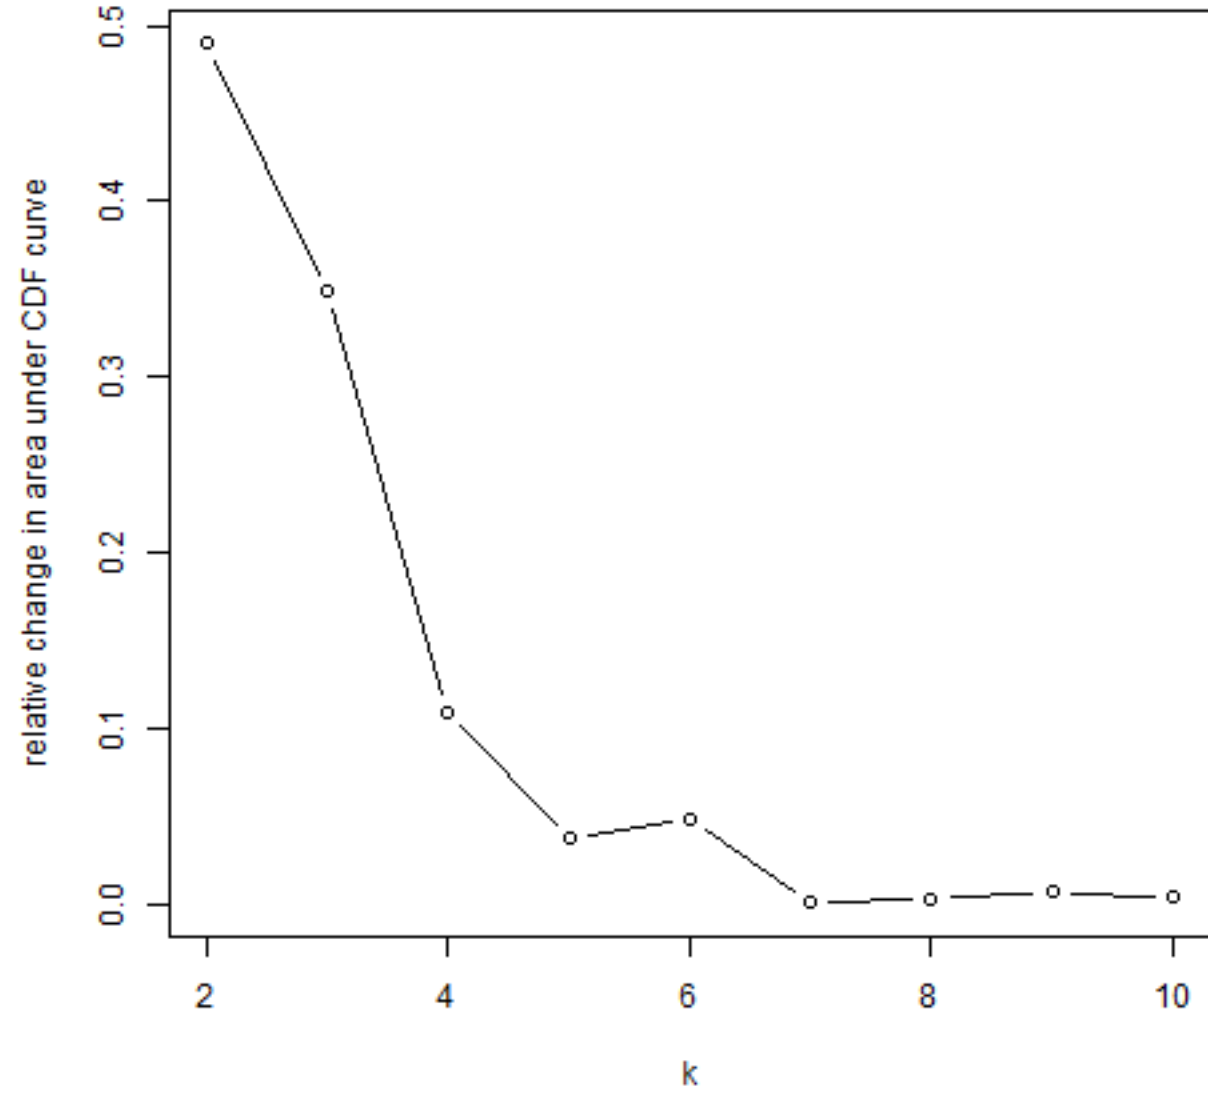

# Figure S3

## A

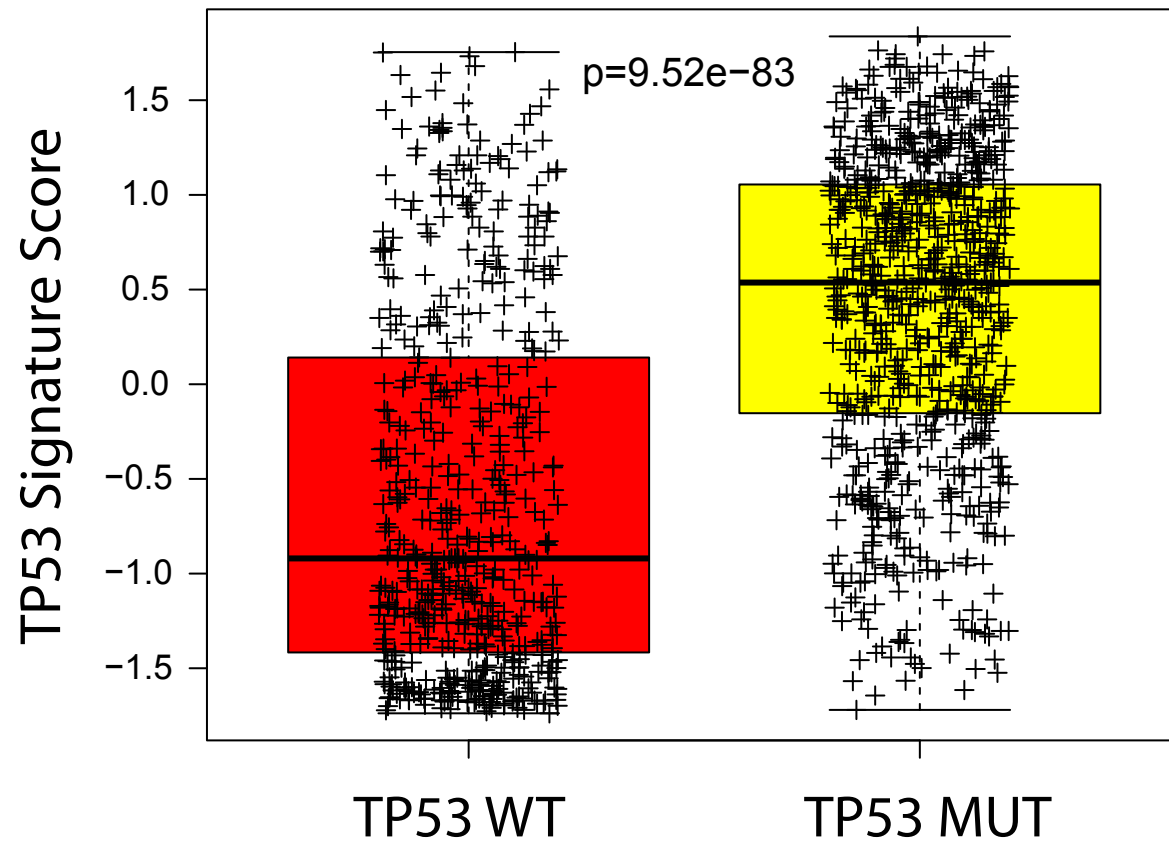

## B

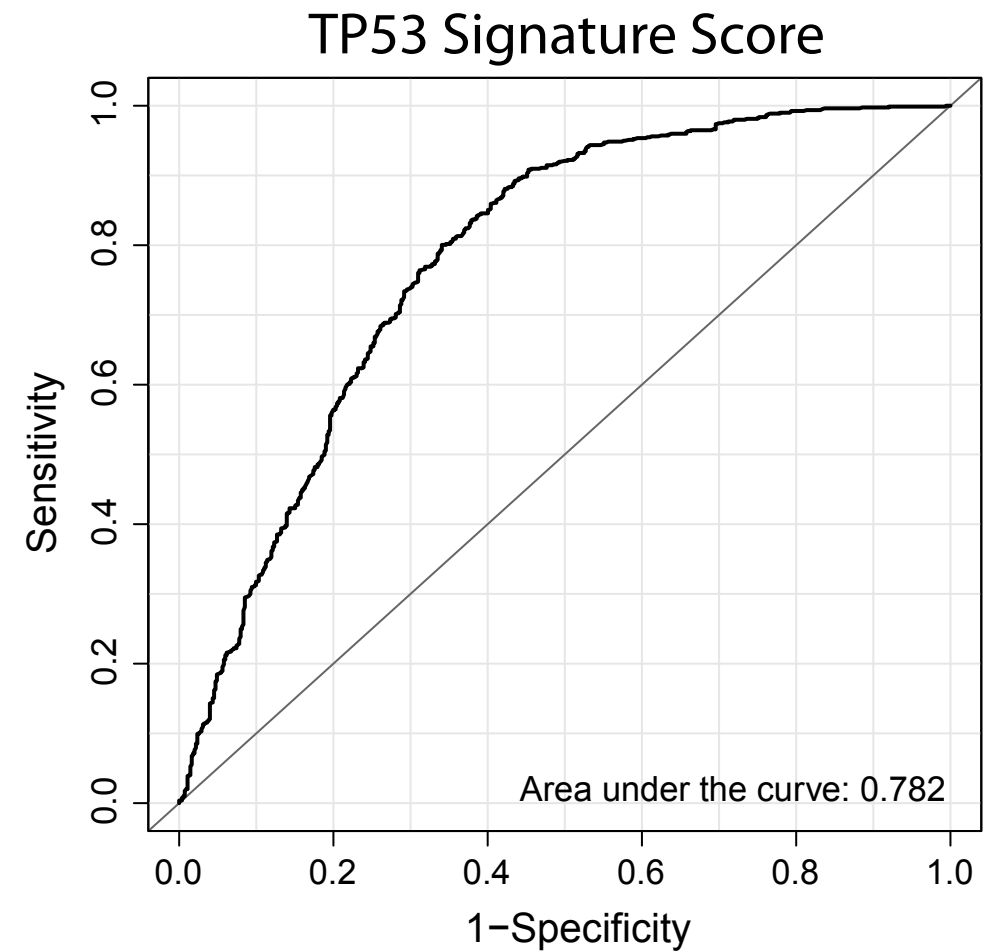

## C

|                         | TP53MUT | %   | TP53WT | %   | TOTAL | TP53 Signature Score<br>Area under the ROC curve |
|-------------------------|---------|-----|--------|-----|-------|--------------------------------------------------|
| All samples             | 797     | 59% | 552    | 41% | 1349  | 0.782                                            |
| OVARIAN                 | 303     | 96% | 13     | 4%  | 316   | 0.71                                             |
| BREAST (NON-BASAL-LIKE) | 113     | 27% | 303    | 73% | 416   | 0.802                                            |
| BREAST BASAL-LIKE       | 76      | 82% | 17     | 18% | 93    | 0.587                                            |
| BREAST (ALL)            | 189     | 37% | 320    | 63% | 509   | 0.847                                            |
| CCR                     | 112     | 54% | 94     | 46% | 206   | 0.71                                             |
| GBM                     | 30      | 40% | 45     | 60% | 75    | 0.649                                            |
| LUAD                    | 62      | 51% | 59     | 49% | 121   | 0.748                                            |
| SQCLC                   | 101     | 83% | 21     | 17% | 122   | 0.609                                            |
| LUNG (ALL)              | 92      | 47% | 104    | 53% | 196   | 0.749                                            |

# Figure S4

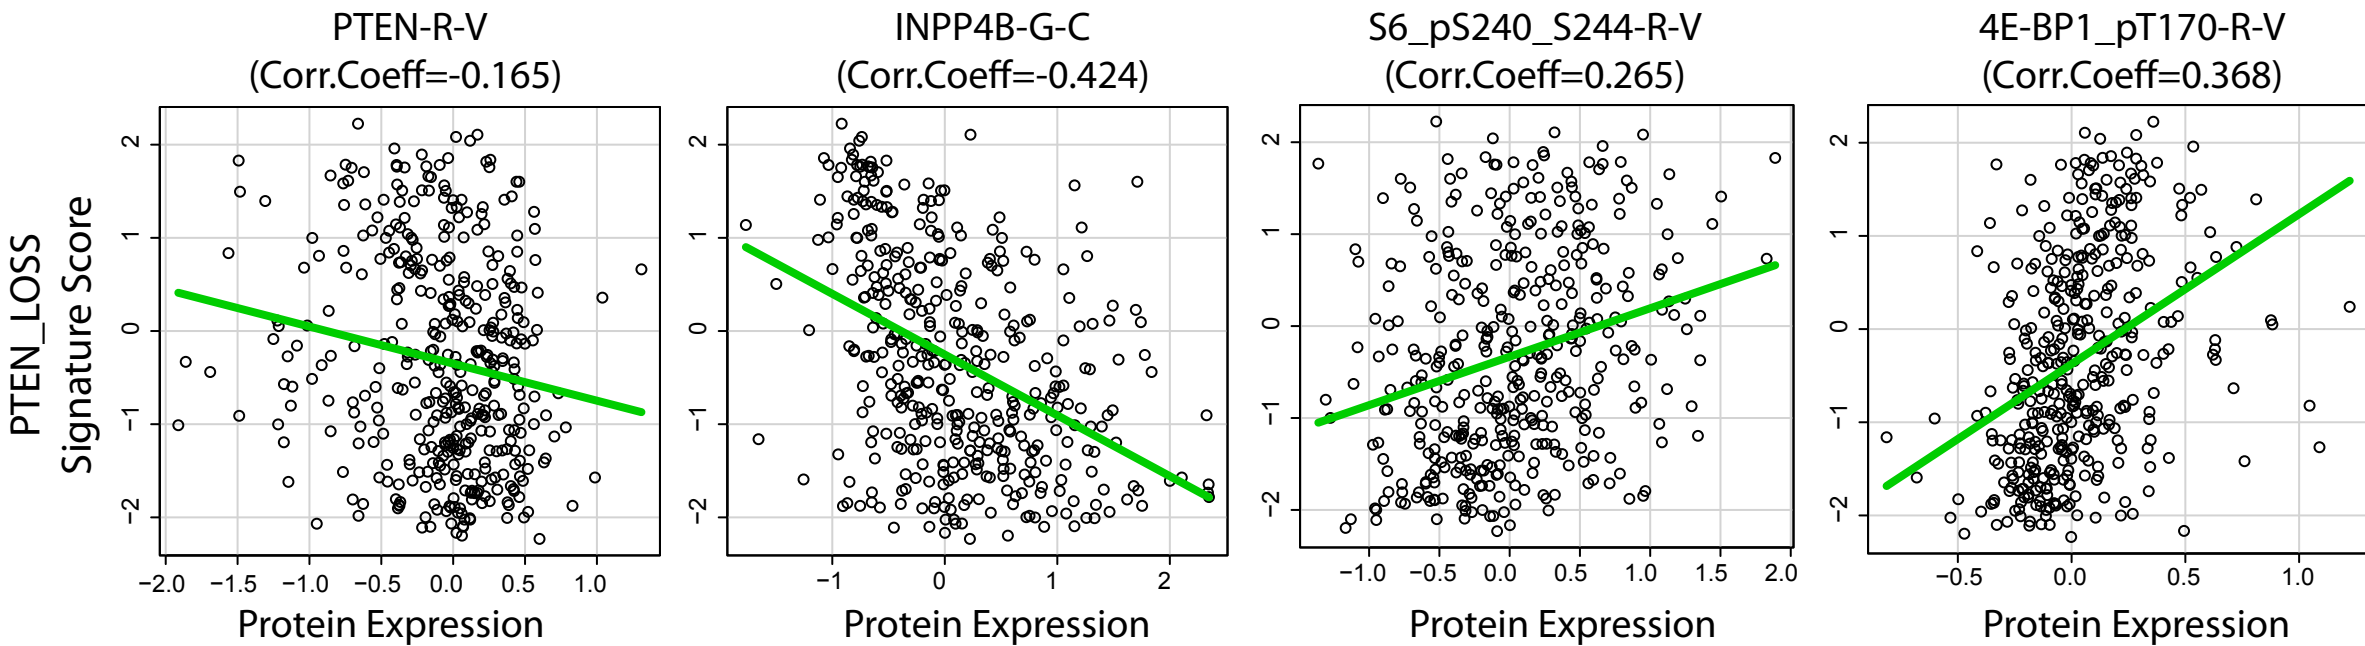

# Figure S5

## Tumor Type

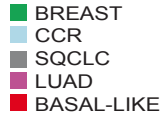

## Claudin-low subtype

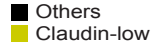

## PAM50 subtype

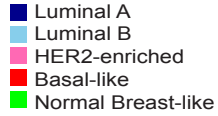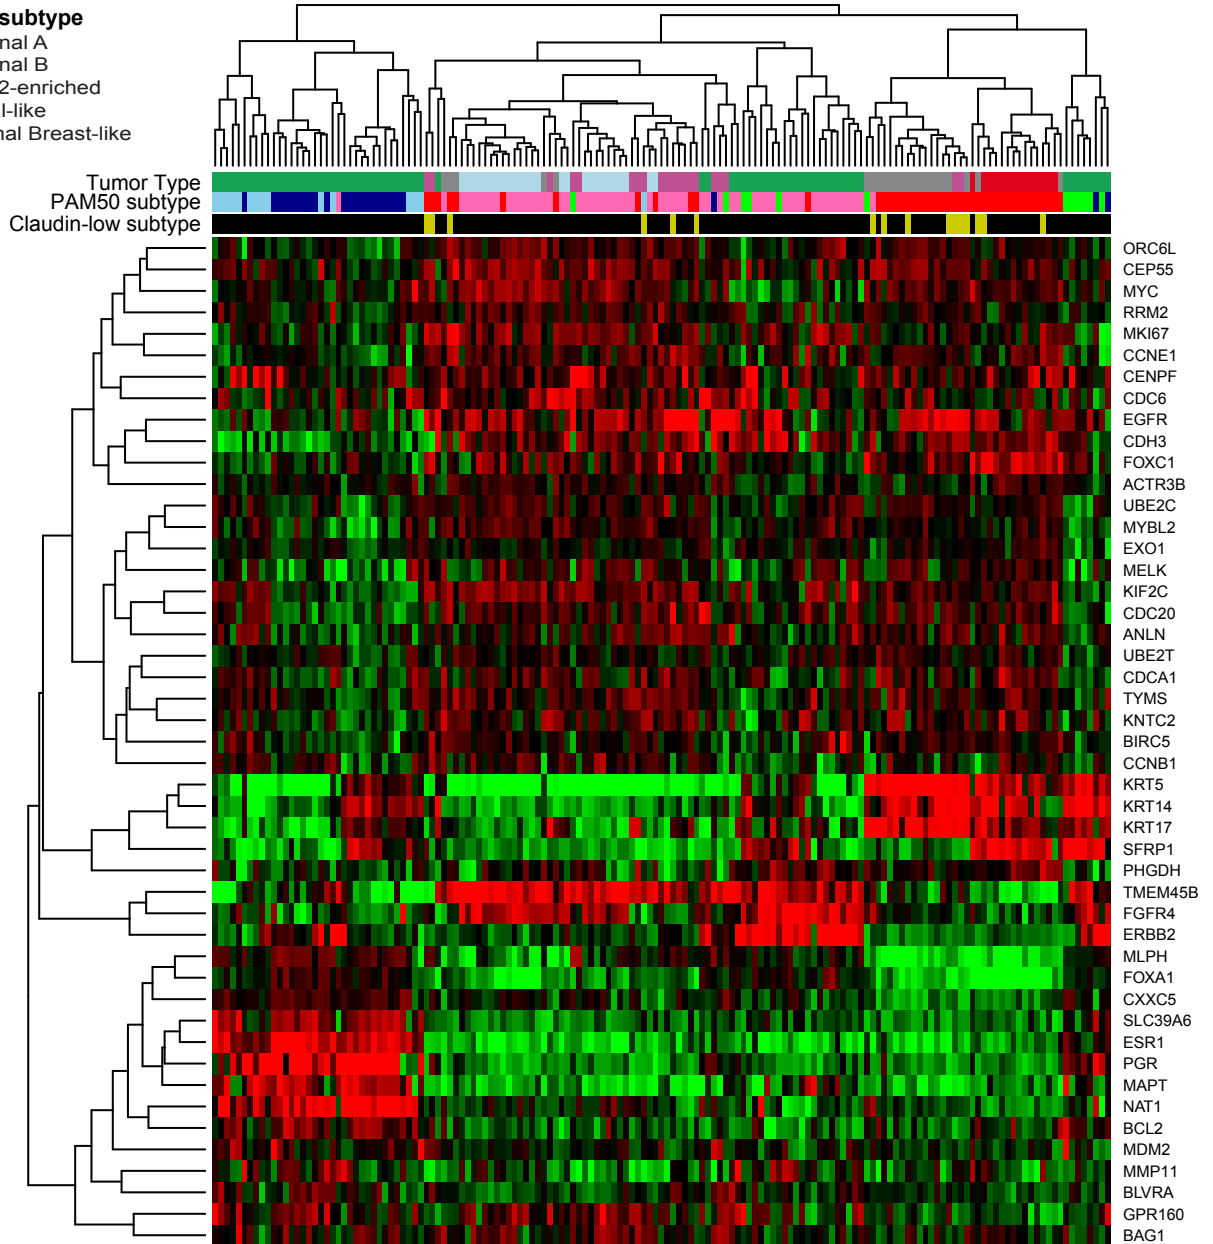

# Figure S6

**Tumor Type**

- BREAST
- CCR
- BASAL-LIKE

**PAM50 subtype**

- Luminal A
- Luminal B
- HER2-enriched
- Basal-like
- Normal Breast-like

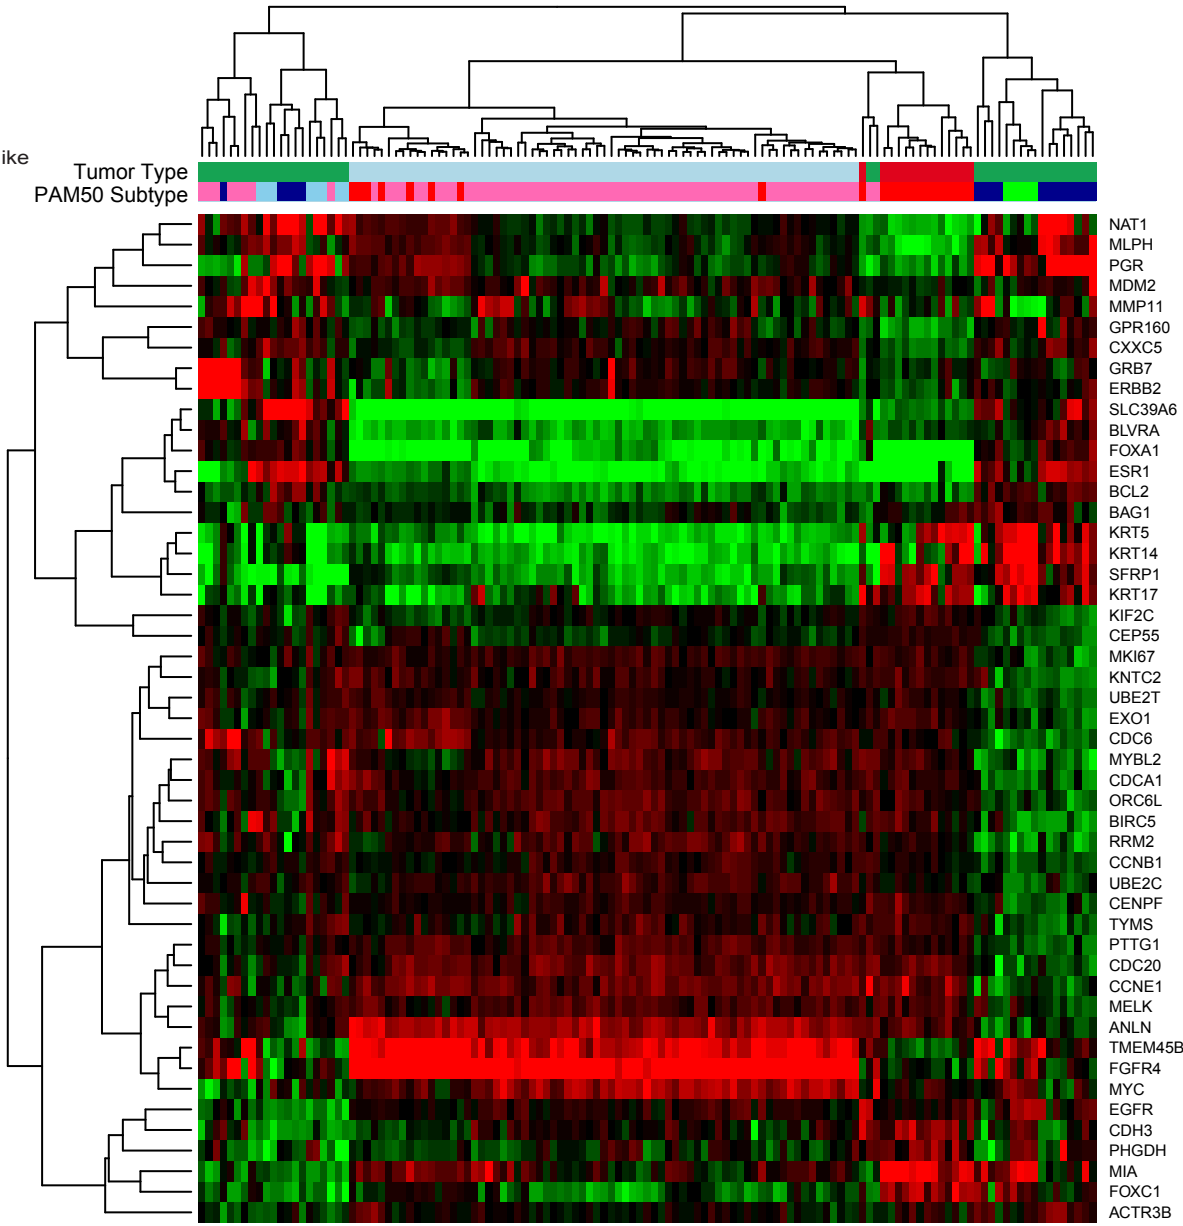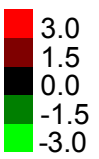



# Figure S7

## Tumor Type

- BREAST
- CCR
- BASAL-LIKE

## PAM50 subtype

- Luminal A
- Luminal B
- HER2-enriched
- Basal-like
- Normal Breast-like

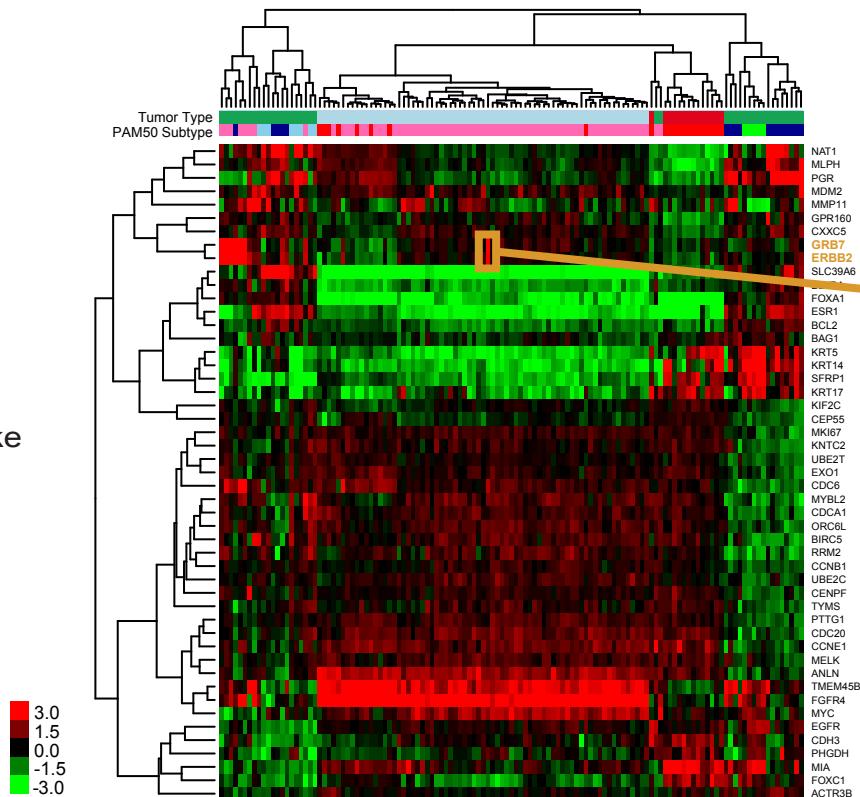

## CRC SAMPLE PAM50 HER2E

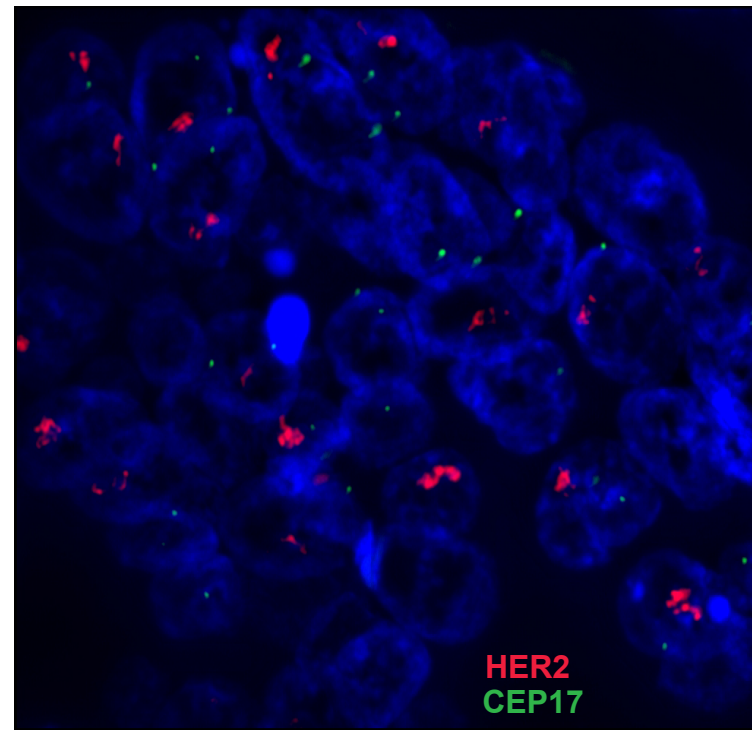



# Figure S9

Microarray BarCode Number

+ Above median

+ Below median

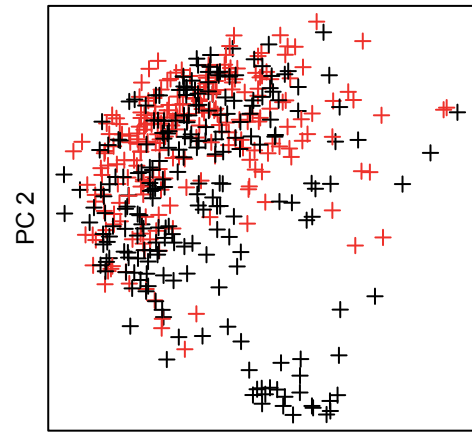

PC 1

BREAST in Barcode(low/high)

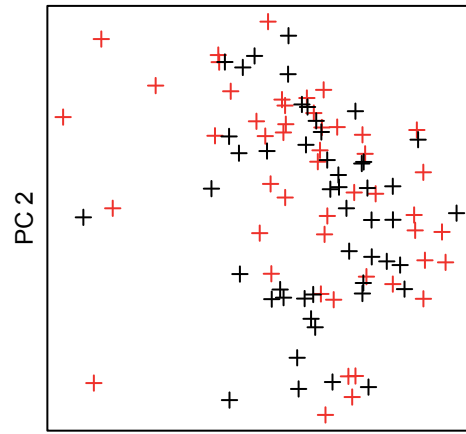

PC 1

BREAST\_Basal in Barcode(low/high)

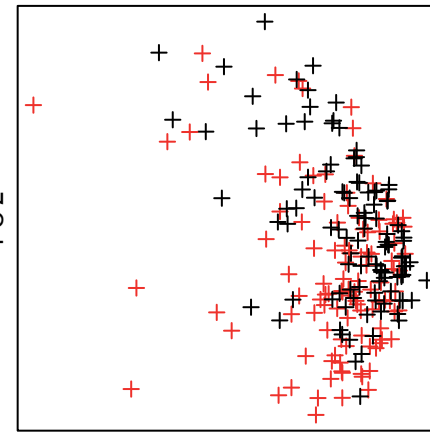

PC 1

CCR in Barcode(low/high)

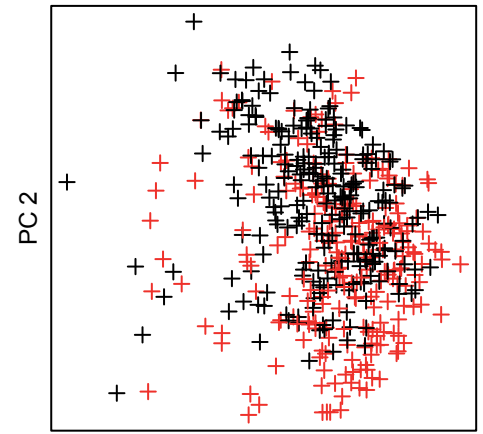

PC 1

OVARIAN in Barcode(low/high)

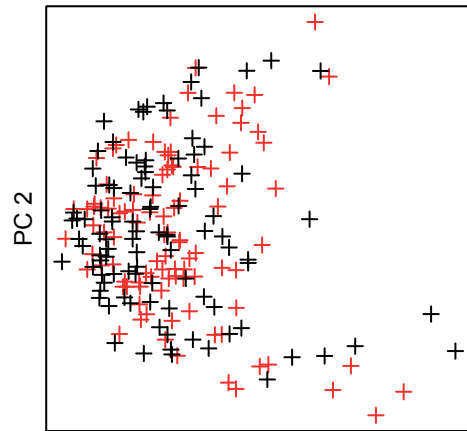

PC 1

GBM in Barcode

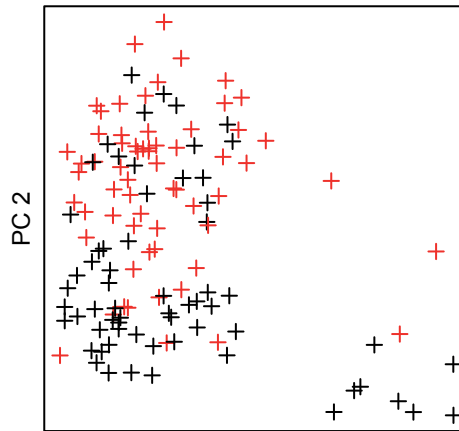

PC 1

LUAD in Barcode(low/high)

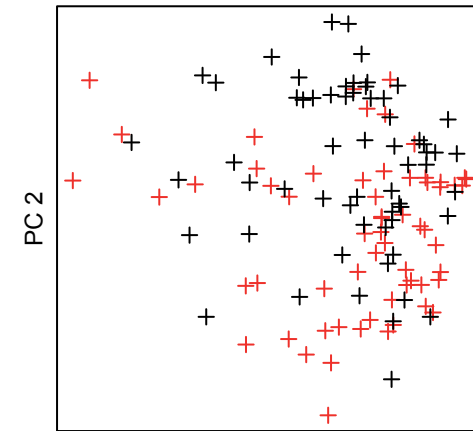

PC 1

SCC in Barcode(low/high)
